# Supplementary material for: The Limited Impact of Low-Volume Recreational Dance on Three-Compartment Body Composition and Apparent Bone Mineral Density in Young Girls
Source: MDPI journal article supplement (doi:10.3390/children9030391), 2022-03-10
Supplement: s1 [file s1]

Supplementary Table S1. Descriptive statistics of DXA-measured body composition variables in the three groups of girls according to the standard DXA output. Means  $\pm$  SD.

| Variable                           | Group                 |                       |                       |
|------------------------------------|-----------------------|-----------------------|-----------------------|
|                                    | C<br>(n=22)           | RD<br>(n=21)          | RG<br>(n=22)          |
| Whole body (WB)                    |                       |                       |                       |
| Bone mineral                       |                       |                       |                       |
| WB AREA (cm <sup>2</sup> )         | 1563.7 $\pm$ 243.10   | 1513.1 $\pm$ 255.74   | 1381.9 $\pm$ 215.96   |
| WB BMC (g)                         | 1319.4 $\pm$ 328.63   | 1258.7 $\pm$ 390.44   | 1134 $\pm$ 313.79     |
| WB BMD (g/cm <sup>2</sup> )        | 0.832 $\pm$ 0.0896    | 0.815 $\pm$ 0.1129    | 0.808 $\pm$ 0.0911    |
| TBLH BMC (g)                       | 936.1 $\pm$ 290.39    | 887.1 $\pm$ 321.55    | 779.1 $\pm$ 278.95    |
| TBLH BMD (g/cm <sup>2</sup> )      | 0.682 $\pm$ 0.1021    | 0.669 $\pm$ 0.1107    | 0.654 $\pm$ 0.1031    |
| Left-arm BMC (g)                   | 66.6 $\pm$ 24.39      | 67.3 $\pm$ 27.24      | 64.9 $\pm$ 24.57      |
| Left-arm BMD (g/cm <sup>2</sup> )  | 0.492 $\pm$ 0.0746    | 0.492 $\pm$ 0.0823    | 0.510 $\pm$ 0.0729    |
| Right arm BMC (g)                  | 78.2 $\pm$ 26.15      | 74.7 $\pm$ 29.89      | 69.1 $\pm$ 27.14      |
| Right arm BMD (g/cm <sup>2</sup> ) | 0.513 $\pm$ 0.0800    | 0.514 $\pm$ 0.0878    | 0.516 $\pm$ 0.0822    |
| Pelvis BMC (g)                     | 139.6 $\pm$ 47.36     | 129.5 $\pm$ 51.77     | 117.3 $\pm$ 49.11     |
| Pelvis BMD (g/cm <sup>2</sup> )    | 0.835 $\pm$ 0.1526    | 0.813 $\pm$ 0.1760    | 0.776 $\pm$ 0.1714    |
| Left leg (g)                       | 230.4 $\pm$ 67.82     | 217.9 $\pm$ 72.65     | 186.7 $\pm$ 61.25     |
| Left leg BMD (g/cm <sup>2</sup> )  | 0.805 $\pm$ 0.1310    | 0.790 $\pm$ 0.1315    | 0.757 $\pm$ 0.1221    |
| Right leg BMC (g)                  | 227.5 $\pm$ 73.28     | 214.7 $\pm$ 72.34     | 180.6 $\pm$ 59.79     |
| Right leg BMD (g/cm <sup>2</sup> ) | 0.800 $\pm$ 0.1333    | 0.790 $\pm$ 0.1344    | 0.751 $\pm$ 0.1195    |
| Trunk BMC (g)                      | 330.4 $\pm$ 104.80    | 312.5 $\pm$ 123.17    | 277.7 $\pm$ 108.74    |
| Trunk BMD (g/cm <sup>2</sup> )     | 0.652 $\pm$ 0.0950    | 0.628 $\pm$ 0.1143    | 0.985 $\pm$ 0.5290    |
| FM & LSTM                          |                       |                       |                       |
| Left-arm FM (g)                    | 635.7 $\pm$ 305.41    | 565.0 $\pm$ 275.46    | 349.0 $\pm$ 172.21    |
| Left-arm LSTM (g)                  | 1376.9 $\pm$ 343.20   | 1330.9 $\pm$ 312.15   | 1368.0 $\pm$ 379.25   |
| Right arm FM (g)                   | 635.7 $\pm$ 312.44    | 573.3 $\pm$ 276.47    | 361.1 $\pm$ 179.54    |
| Right arm LSTM (g)                 | 1513.1 $\pm$ 382.16   | 1490.8 $\pm$ 355.10   | 1429.1 $\pm$ 414.50   |
| Trunk FM (g)                       | 3989.5 $\pm$ 1934.90  | 3804.0 $\pm$ 2007.11  | 2233.4 $\pm$ 1176.15  |
| Trunk %FM                          | 20.1 $\pm$ 5.09       | 20.3 $\pm$ 5.43       | 14.9 $\pm$ 3.16       |
| Left leg FM (g)                    | 2658.5 $\pm$ 1071.38  | 2404.6 $\pm$ 978.67   | 1456.6 $\pm$ 647.77   |
| Left leg LSTM (g)                  | 4769.7 $\pm$ 1396.17  | 4732.2 $\pm$ 1310.82  | 4138.2 $\pm$ 1238.92  |
| Right leg FM (g)                   | 2674.7 $\pm$ 1095.26  | 2401.9 $\pm$ 1007.12  | 1468.4 $\pm$ 663.15   |
| Right leg LSTM (g)                 | 4790.9 $\pm$ 1473.28  | 4812.3 $\pm$ 1389.26  | 4090.9 $\pm$ 1231.70  |
| WB FM (g)                          | 11368.6 $\pm$ 4627.86 | 10498.9 $\pm$ 4460.86 | 6591.5 $\pm$ 2832.37  |
| WB %FM                             | 26.4 $\pm$ 5.03       | 25.3 $\pm$ 4.68       | 19.4 $\pm$ 3.32       |
| WB LSTM (g)                        | 29194.2 $\pm$ 7721.31 | 28861.1 $\pm$ 7625.88 | 25447.1 $\pm$ 6872.41 |
| TBLH FM (g)                        | 10612.1 $\pm$ 4580.21 | 9749.0 $\pm$ 4427.36  | 5868.6 $\pm$ 2791.10  |
| TBLH LSTM (g)                      | 26572.1 $\pm$ 7559.03 | 26262.6 $\pm$ 7510.03 | 22936.3 $\pm$ 6711.80 |
| Appendicular FM (g)                | 6622.7 $\pm$ 2766.39  | 5944.9 $\pm$ 2487.80  | 3635.1 $\pm$ 1642.00  |

|                                                 |                |                |                |
|-------------------------------------------------|----------------|----------------|----------------|
| Appendicular %FM                                | 32.7±6.4       | 30.9±5.11      | 23.5±4.70      |
| Special skeletal sites                          |                |                |                |
| Spine                                           |                |                |                |
| Lumbar vertebrae (1-4) BMC (g)                  | 36.2 ± 12.45   | 33.0 ± 14.81   | 34.7 ± 13.39   |
| Lumbar vertebrae (1-4) BMD (g/cm <sup>2</sup> ) | 0.745 ± 0.1517 | 0.709 ± 0.1699 | 0.729 ± 0.1547 |
| Hip                                             |                |                |                |
| Trochanter BMC (g)                              | 4.6 ± 1.73     | 4.1 ± 1.89     | 4.1 ± 1.50     |
| Trochanter BMD (g/cm <sup>2</sup> )             | 0.670 ± 0.1096 | 0.591 ± 0.099  | 0.610 ± 0.0815 |
| Intertrochanter BMC (g)                         | 11.5 ± 3.54    | 11.5 ± 3.58    | 10.6 ± 2.71    |
| Intertrochanter BMD (g/cm <sup>2</sup> )        | 0.837 ± 0.1560 | 0.800 ± 0.1339 | 0.849 ± 0.1243 |
| Femoral neck BMC (g)                            | 2.8 ± 0.81     | 2.6 ± 0.85     | 2.6 ± 0.65     |
| Femoral neck BMD (g/cm <sup>2</sup> )           | 0.697 ± 0.1027 | 0.695 ± 0.1105 | 0.723 ± 0.0844 |
| Ward's area BMC (g)                             | 0.85 ± 0.199   | 0.83 ± 0.161   | 0.88 ± 0.158   |
| Ward's area BMD (g/cm <sup>2</sup> )            | 0.716 ± 0.1476 | 0.706 ± 0.1200 | 0.755 ± 0.1059 |
| Hip total BMC (g)                               | 19.0 ± 5.80    | 18.1 ± 6.09    | 17.4 ± 4.63    |
| Hip total BMD (g/cm <sup>2</sup> )              | 0.747 ± 0.1272 | 0.724 ± 0.1105 | 0.753 ± 0.0919 |

C, physically active controls; RD, recreational dancers; RG, recreational gymnasts; TBLH, total body less head; BMC, bone mineral content; BMD, bone mineral density; FM, fat mass; LSTM, lean soft tissue mass
